# Supplementary material for: Interfacial engineering of a Mo/Hf0.3Zr0.7O2/Si capacitor using the direct scavenging effect of a thin Ti layer
Source: Royal Society of Chemistry journal article supplement (doi:10.1039/d1cc04966f), 2021-01-01
Supplement: d1cc04966f1.pdf [file d1cc04966f1.pdf]

Electronic Supplementary Material (ESI) for Chemical Communications.

Electronic Supplementary Information (ESI) for :

## **Interfacial Engineering of Mo/Hf<sub>0.3</sub>Zr<sub>0.7</sub>O<sub>2</sub>/Si Capacitor Using Direct Scavenging Effect of Thin Ti layer**

Se Hyun Kim<sup>a</sup>, Geun Taek Yu<sup>a</sup>, Geun Hyeong Park<sup>a</sup>, Dong Hyun Lee<sup>a</sup>, Ju Yong Park<sup>a</sup>, Kun Yang<sup>a</sup>, Eun Been Lee<sup>a</sup>, Je In Lee<sup>a,\*</sup> and Min Hyuk Park<sup>a,b,\*</sup>

<sup>a</sup> School of Materials Science and Engineering, Pusan National University, Busan 46241, Republic of Korea.

<sup>b</sup> Department of Materials Science and Engineering & Inter-University Semiconductor Research Center, College of Engineering, Seoul National University, Seoul, Republic of Korea.

E-mail : [jilee@pnu.ac.kr](mailto:jilee@pnu.ac.kr), [minhyuk.park@snu.ac.kr](mailto:minhyuk.park@snu.ac.kr)

**Table of contents :**

**Experimental section**

**Aspect ratio and X-ray diffraction patterns of 12, 20, and 25s Ti samples..... S1**

|                                                                                                                      |        |
|----------------------------------------------------------------------------------------------------------------------|--------|
| STEM HAADF image and EDS elemental maps.....                                                                         | S2     |
| Electrical properties of Mo/Hf <sub>0.3</sub> Zr <sub>0.7</sub> O <sub>2</sub> /Mo capacitor.....                    | S3     |
| 2V <sub>c</sub> value of different Zr/(Hf+Zr) ratio of Mo/HZO/SiO <sub>x</sub> /n <sup>+</sup> Si capacitors.....    |        |
| S4                                                                                                                   |        |
| EDS line scan results.....                                                                                           | S5, S6 |
| Endurance test results of Mo/Hf <sub>0.3</sub> Zr <sub>0.7</sub> O <sub>2</sub> /SiO <sub>x</sub> /Si capacitor..... | S7     |

## Experimental section

Before film deposition, native  $\text{SiO}_x$  was wet-etched using a buffered oxide etchant (BOE) with a 5% hydrofluoric acid solution and an etching time of 30 s. HZO films (10 nm) were deposited using thermal atomic layer deposition (ALD) on highly doped n-type Si ( $n^+\text{Si}$ , resistivity  $\rho = 0.005 \text{ } \Omega\cdot\text{cm}$ ) at substrate temperatures of 280 °C.  $[(\text{CH}_3)(\text{C}_2\text{H}_5)\text{N}]_4\text{Hf}$  (TEMAH) and  $[(\text{CH}_3)(\text{C}_2\text{H}_5)\text{N}]_4\text{Zr}$  (TEMAZ) were used as the metal precursors, and  $\text{O}_3$  was chosen as the oxygen source. The growth of both  $\text{HfO}_2$  and  $\text{ZrO}_2$  was  $\sim 0.096$  nm per cycle. The Mo top electrode was deposited via direct current (DC) reactive sputtering with a shadow mask, and a hole diameter of 200  $\mu\text{m}$  was used for patterning. The plasma power, base pressure, and working pressure were 150 W,  $3 \times 10^{-6}$  Torr, and  $8 \times 10^{-3}$  Torr, respectively. The Ti sacrificial layer was deposited via DC reactive sputtering, using three different sputtering times, namely 12, 20, and 25 s. The plasma power, base pressure, and working pressure were 100 W,  $3 \times 10^{-6}$  Torr, and  $5 \times 10^{-3}$  Torr, respectively. For the crystallization of the as-deposited HZO films, rapid thermal annealing (RTA) was conducted at 500 °C for 30 s under a  $\text{N}_2$  atmosphere.

Structural properties of the samples with and without Ti sputtering were examined using grazing incidence X-ray diffraction (GIXRD, SmartLab, Rigaku) with a Cu X-ray source using an incidence angle of  $\omega = 0.5^\circ$ . Schematics of the device structures are shown in Fig. 1a. Transmission electron microscopy (TEM, TALOS F200X, Thermo Fisher Scientific) was used to examine the nanostructures and chemical nature of the samples by adopting energy dispersive spectroscopy (EDS). Electrical measurements were performed using a semiconductor characterization system (4200A-SCS, Keithley) with an SMU module (Keithley), a pulse measurement unit (4225-PMU, Keithley), and an LCR meter (4100, Wayne Kerr Electronics). Bipolar triangular pulses 3.5 V high were used to measure the polarization–voltage (P-V) curve at a measurement frequency of 1 kHz. For the endurance test, 3.5 V-high positive up negative down (PUND) pulses at a 100 kHz frequency were used. Capacitance-voltage (C-V) measurements were carried out using a small-signal voltage amplitude and frequency of 50 mV and 10 kHz, respectively, for DC voltage between -3.5 V and +3.5 V.

## Aspect ratio and X-ray diffraction patterns of 12, 20, and 25s Ti samples

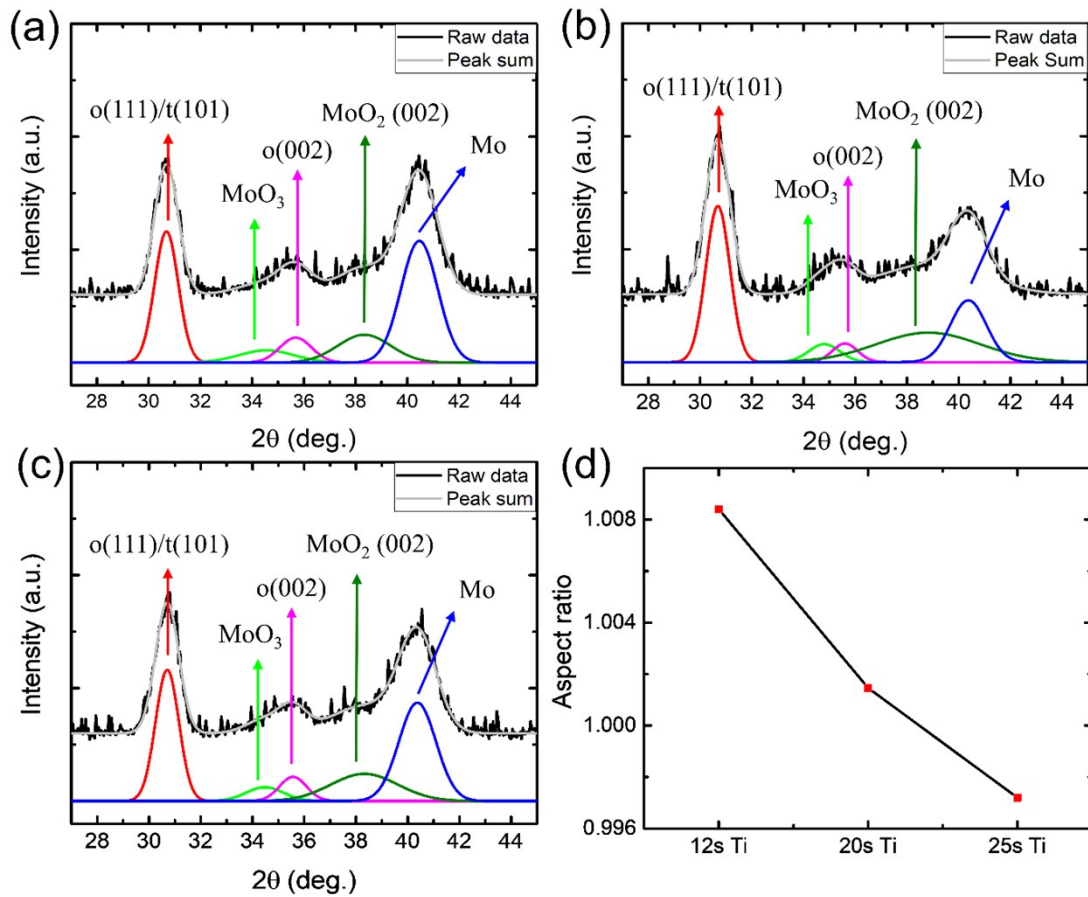

**Figure S1.** An enlarged grazing incidence X-ray diffraction patterns (GIXRD) from fig. 1(b) with  $2\theta$  of  $27^\circ$  to  $45^\circ$ .

(a) 12s Ti, (b) 20s Ti and (c) 25s Ti. (d) The aspect ratio ( $2a/(b+c)$ ) for orthorhombic phase was calculated by Gaussian fitting for the various diffraction peaks from the  $\text{Hf}_{0.3}\text{Zr}_{0.7}\text{O}_2$ , Mo,  $\text{MoO}_2$ , and  $\text{MoO}_3$ .

From fig. S1(a)-(c), o(111)/t(101)  $2\theta$  peak positions of 12s, 20s and 25s Ti were  $30.68^\circ$ ,  $30.68^\circ$ ,  $30.70^\circ$ . And o(002)  $2\theta$  peak positions of 12s, 20s and 25s Ti were  $35.68^\circ$ ,  $35.60^\circ$  and  $35.56^\circ$  respectively. Lattice parameters a, b, and c were calculated from angles of o(111)/t(101) and o(002) diffraction peaks. And the aspect ratio ( $2a/(b+c)$ ) for the orthorhombic phase were calculated from lattice parameters. In fig. S1. (d), the aspect ratio decreased with increasing Ti sputtering time and the aspect ratio of 25s Ti is the lowest. This aspect ratio change means that changing fractions of orthorhombic phase in  $\text{Hf}_{0.3}\text{Zr}_{0.7}\text{O}_2$  films. When the aspect ratio decreases, a fraction of orthorhombic phase in  $\text{Hf}_{0.3}\text{Zr}_{0.7}\text{O}_2$  film is also decreased and this is the reason for the lowest  $P_{\text{sat}}$  values of 25s Ti be shown in fig. 4.



# STEM HAADF image and EDS elemental maps

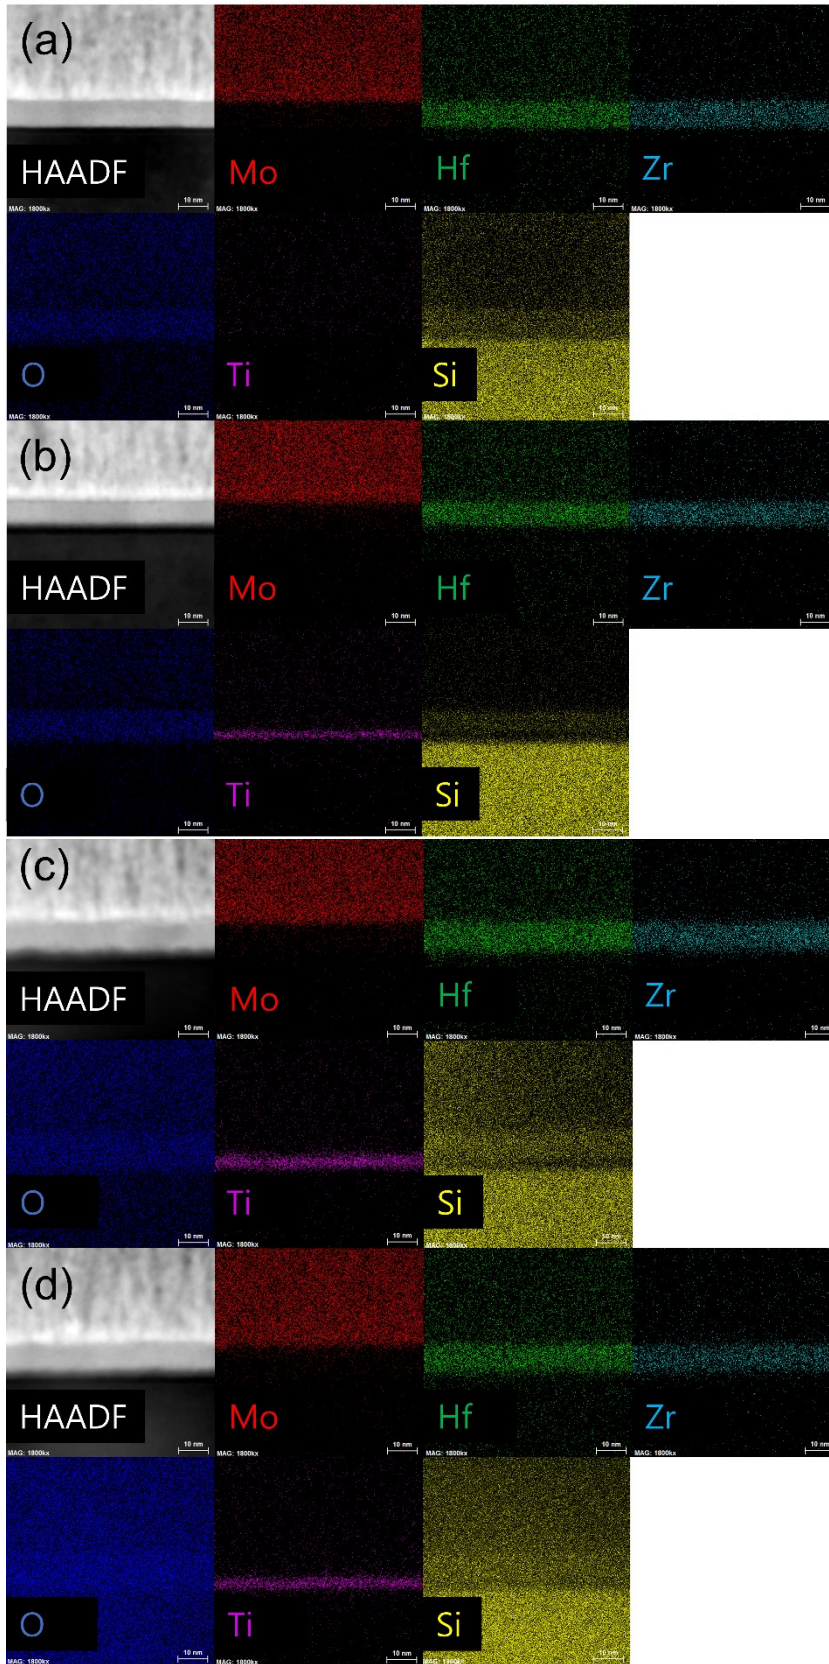

**Figure S2.** STEM (scanning transmission electron microscopy) HAADF (high angle annular dark field) image and EDS (energy dispersive spectroscopy) elemental maps of (a) Mo/Hf<sub>0.3</sub>Zr<sub>0.7</sub>O<sub>2</sub>/SiO<sub>x</sub>/Si capacitor without Ti and (b) Mo/Hf<sub>0.3</sub>Zr<sub>0.7</sub>O<sub>2</sub>/TiO<sub>x</sub>/SiO<sub>x</sub>/Si capacitor with Ti sputtering time 12 s. (c) Mo/Hf<sub>0.3</sub>Zr<sub>0.7</sub>O<sub>2</sub>/TiO<sub>x</sub>/SiO<sub>x</sub>/Si capacitor with Ti sputtering time 20 s. (d) Mo/Hf<sub>0.3</sub>Zr<sub>0.7</sub>O<sub>2</sub>/TiO<sub>x</sub>/SiO<sub>x</sub>/Si capacitor with Ti sputtering time 25 s.

Fig. S2 shows High Angle Annular Dark Field (HAADF) images using the Scanning Transmission Electron Microscopy (STEM) and Electron Dispersive Spectroscopy (EDS) elemental maps of with and without Ti sputtering. Mo appeared in top layer. Below the Mo, Hf and Zr which is solid solution appeared in almost the same region. For different Ti sputtering samples, Ti appeared at the interface between Hf<sub>0.3</sub>Zr<sub>0.7</sub>O<sub>2</sub> layer and Si substrate. These results indicate that Ti was formed into a thin film despite the short Ti sputtering time.

### Electrical properties of Mo/Hf<sub>0.3</sub>Zr<sub>0.7</sub>O<sub>2</sub>/Mo capacitor

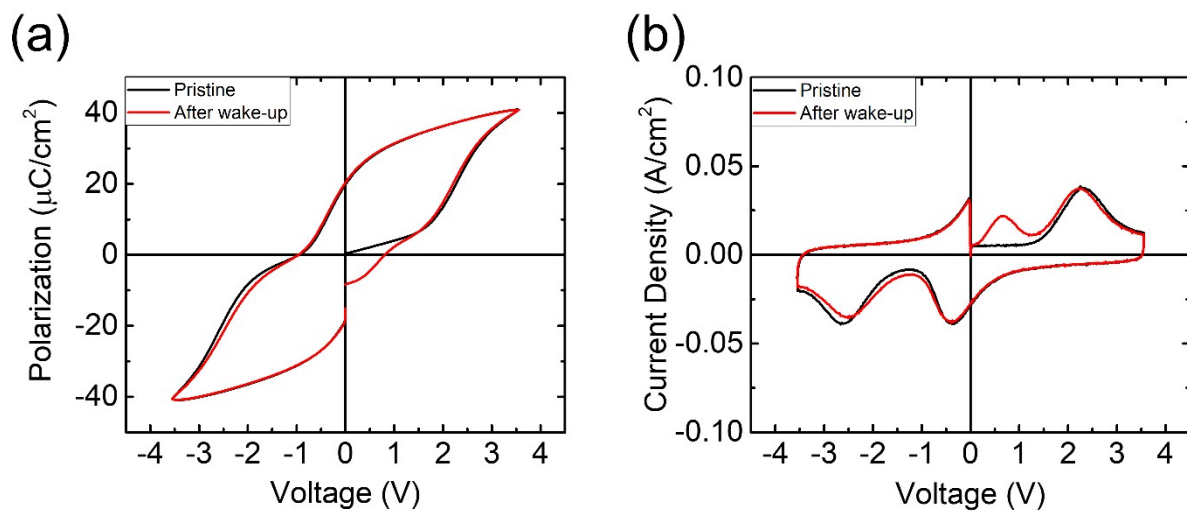

**Figure S3.** (a) P-V and (b) switching current density-voltage curves of Mo/Hf<sub>0.3</sub>Zr<sub>0.7</sub>O<sub>2</sub>/Mo capacitor. The amplitude of  $\pm 3.5$  V with 100 kHz PUND pulses were used to wake-up during  $10^3$  cycles.

## 2V<sub>c</sub> value of different Zr/(Hf+Zr) ratio of Mo/HZO/SiO<sub>x</sub>/n<sup>+</sup>Si capacitors

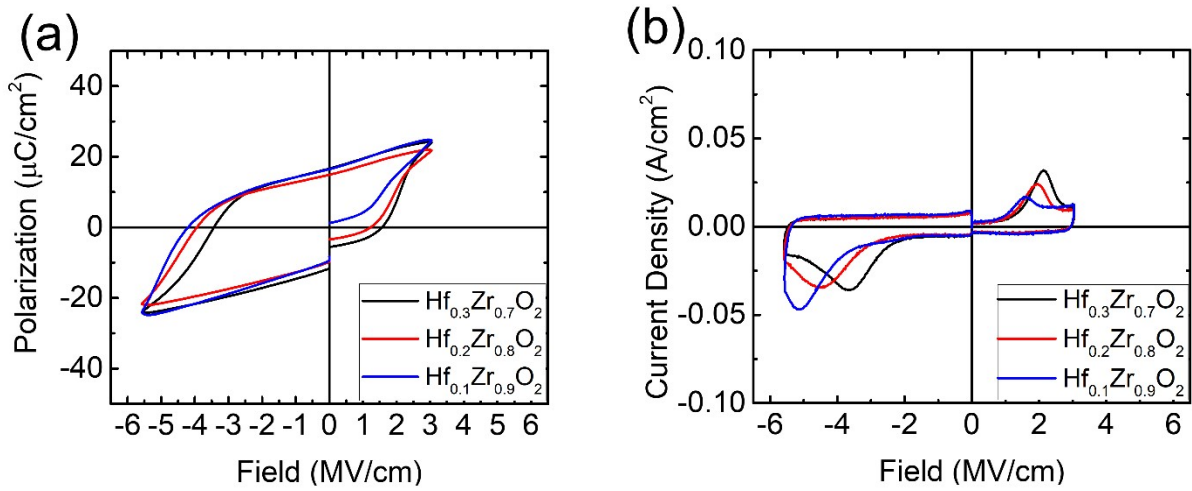

**Figure S4.** (a) P-V and (b) switching current density-voltage curves of different Zr/(Hf+Zr) ratios of Mo/Hf<sub>1-x</sub>Zr<sub>x</sub>O<sub>2</sub>/SiO<sub>x</sub>/Si capacitors.

Fig. S4a shows ferroelectric-like P-V curve of different Zr/(Hf+Zr) ratios of Mo/HZO/SiO<sub>x</sub>/Si capacitors. And From fig. S4b. double coercive voltage (2V<sub>c</sub>) values of Hf<sub>0.3</sub>Zr<sub>0.7</sub>O<sub>2</sub>, Hf<sub>0.2</sub>Zr<sub>0.8</sub>O<sub>2</sub>, Hf<sub>0.1</sub>Zr<sub>0.9</sub>O<sub>2</sub> film capacitors are 5.77, 6.44, and 7.75 V, respectively. These two results were evidenced for charge trapping induced by ferroelectric-like behavior. In general study, when Zr/(Hf+Zr) ratio increase 2V<sub>c</sub> value was decreased. Opposite about general study Mo/HZO/SiO<sub>x</sub>/Si capacitors' 2V<sub>c</sub> value increased with increasing Zr/(Hf+Zr) ratio, 0.7 to 0.9.



## EDS line scan results

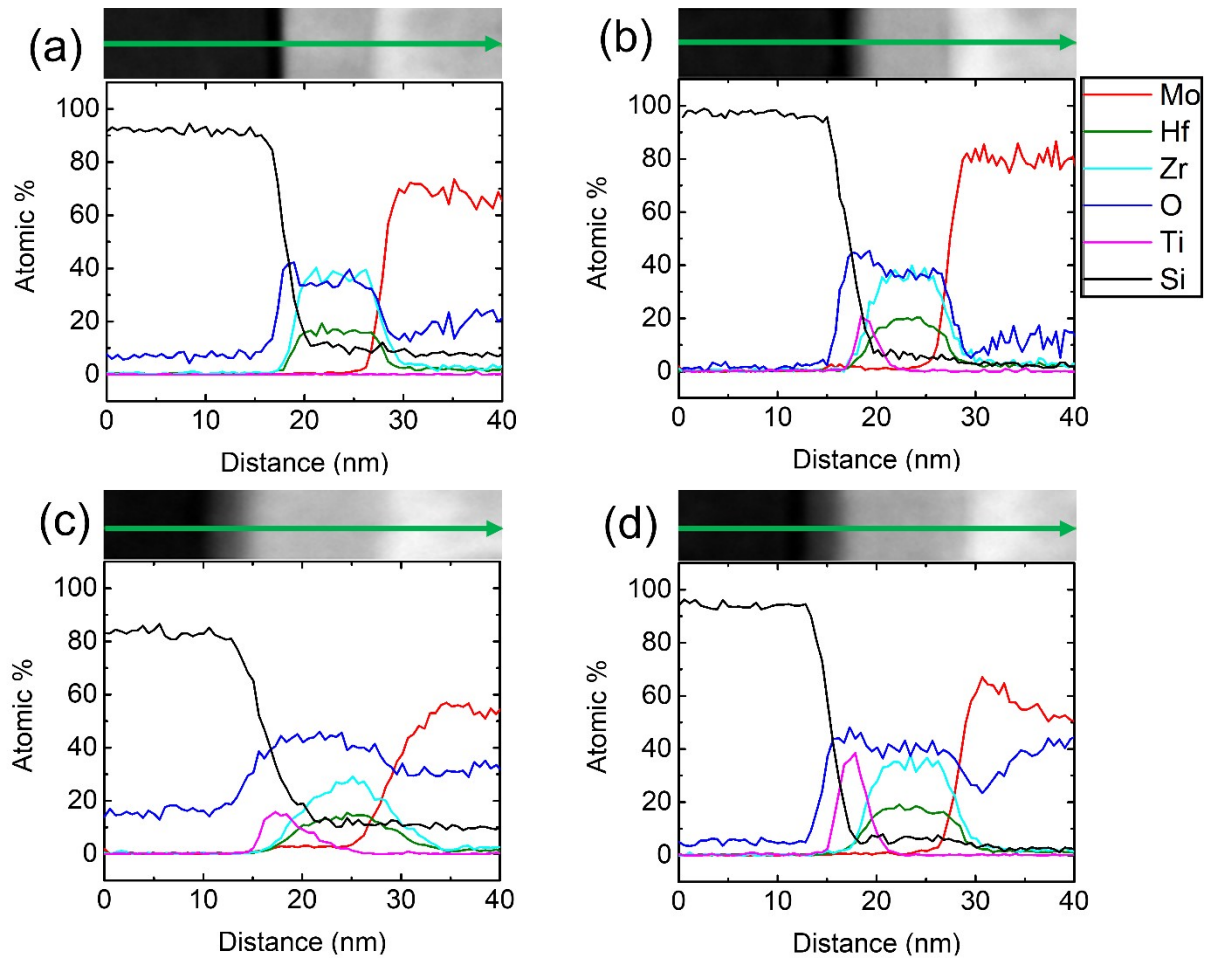

**Figure S5.** Image of EDS line scan full area and EDS line scan results of (a) No Ti, (b) 12 s Ti, (c) 20 s Ti and (d) 25 s Ti.

In fig. S5a, the atomic % of the elements according to the distance were identified. First, Si appeared and oxidized Hf and Zr appeared in the same region as a solid solution which is confirmed in fig. S2. In Fig. S5b-d, the other things are the same in fig. S5a, exceptionally, the Ti layer appeared at the HZO/Si interface.

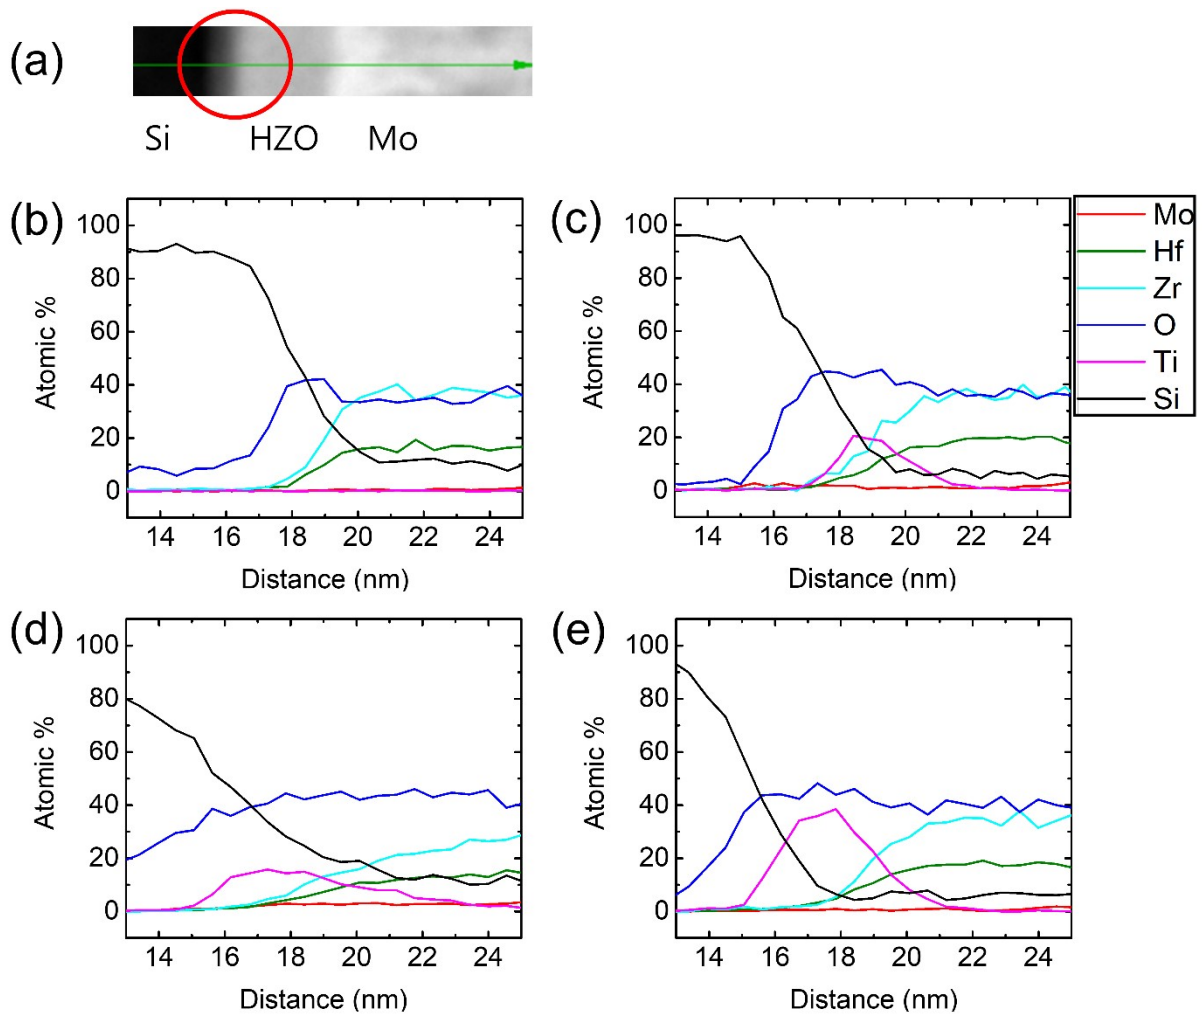

**Figure S6.** (a) Image of EDS line scan specific area and EDS line scan results of (b) No Ti, (c) 12 s Ti, (d) 20 s Ti and (e) 25 s Ti extracted from fig. S5.

The HZO/Si interface was mainly shown in the results of the entire line scan. In fig. S6b, it can be confirmed that Si was oxidized during the ALD and RTP process so that O and Si exist in the same area. In fig. S6c-e, it can be confirmed that Ti was oxidized and simultaneously form titanium silicides combined with Si. Therefore  $(\text{Ti}, \text{Si})\text{O}_x$  thin film simultaneously was existed. Ti thickness which is calculated from fig. S6c-d was 2.14, 3.91, and 3.90 nm respectively. The thickness of Ti was overestimated when compared to the results measured from the TEM images.

## Endurance test results of Mo/Hf<sub>0.3</sub>Zr<sub>0.7</sub>O<sub>2</sub>/SiO<sub>x</sub>/Si capacitor

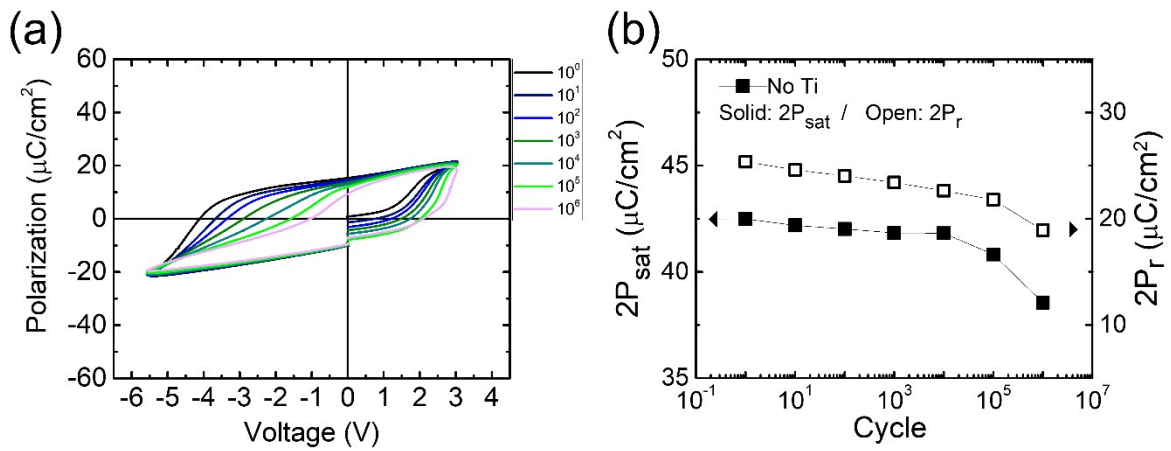

**Figure S7.** (a) Endurance test results of Mo/Hf<sub>0.3</sub>Zr<sub>0.7</sub>O<sub>2</sub>/SiO<sub>x</sub>/Si capacitor and (b) The doubled saturated polarization (2P<sub>sat</sub>) and doubled remanent polarization (2P<sub>r</sub>) values extracted from (a) as functions of number of switching cycles.

In fig. S7a as the cycles were applied, the P-V curve of each cycle was collapsed and the 2P<sub>r</sub> value continued to decrease. In fig. S7b, 2P<sub>r</sub> and 2P<sub>sat</sub> value were decreased 25.36 to 18.91 μC/cm<sup>2</sup> (~25 % decreased), 42.49 to 38.56 μC/cm<sup>2</sup> (~9 % decreased), respectively, after 10<sup>6</sup> cycles. The P-V curve of no Ti did not withstand 10<sup>7</sup> cycles and strong fatigue occurred. It is noticed that the endurance was significantly decreased compared with Mo/Hf<sub>0.3</sub>Zr<sub>0.7</sub>O<sub>2</sub>/TiO<sub>x</sub>/SiO<sub>x</sub>/Si capacitors with different Ti sputtering times. These results indicate that Ti sacrificial layer affects operation voltage and increases endurance properties.
